# Supplementary material for: Simultaneous detection of breast cancer biomarkers HER2 and miRNA-21 based on duplex-specific nuclease signal amplification
Source: Royal Society of Chemistry journal article supplement (doi:10.1039/d4tb01845a), 2024-01-01
Supplement: d4tb01845a1.pdf [file d4tb01845a1.pdf]

Simultaneous detection of breast cancer biomarkers HER2 and miRNA-21 based on duplex-specific nuclease signal amplification

Miao He<sup>a1</sup>, Zhiqiang Hou<sup>a1</sup>, Feifan Yin<sup>a</sup>, Wenting Cheng<sup>a</sup>, Yang Xiang<sup>a,b,\*</sup>, Zhongyun Wang<sup>c,\*</sup>

<sup>a</sup>*State Key Laboratory of Pharmaceutical Biotechnology, School of Life Sciences, Nanjing University, Nanjing 210023, P. R. China*

<sup>b</sup>*State Key Laboratory of Natural and Biomimetic Drugs, Peking University, Beijing 100191, P. R. China*

<sup>c</sup>*Department of Anesthesiology, The First Affiliated Hospital of Nanjing Medical University, Nanjing 210029, P. R. China*

Corresponding authors.

E-mail address: xiangy@nju.edu.cn (Y. Xiang), zywang1970@126.com (Z. Wang)

<sup>1</sup>These authors contributed equally to this work.

## **Contents**

**Table S1.** The DNA sequences used in this work

**4**

**Figure S1.** The fluorescence of Cy5 and FAM decreased in the modified solution

**5**

**Figure S2.** Individual sensitivity detection of HER2 protein.

**6**

**Figure S3.** Individual sensitivity detection of miRNA-21

**7**

**Table S2.** Recovery in serum of healthy people with different concentrations.

**8**

**Author contributions**

**9**

**Table S1.** The DNA sequences used in this work.

| NAME                      | Sequence (5'-3')                                                           |
|---------------------------|----------------------------------------------------------------------------|
| HER2 aptamer              | GCAGCGGTGTGGGG                                                             |
| DNA1                      | Biotin-<br>AAAAAAAAAAAAAAAAAAAAATCAACATCAGTCTGATAAGCTAAAA<br>AAAAAAAAA-Cy5 |
| DNA 2                     | Biotin-<br>AAAAAAAAAAAAAAAAAAAAACCACACCGCTGCAAAAAAAAAAAAA<br>-FAM          |
| miRNA-21                  | UAGCUUAUCAGACUGAUGUUGA                                                     |
| miRNA-122                 | UGGAGUGUGACAAUGGUGUUUG                                                     |
| miRNA-96                  | UUUGGCACUAGCACAUUUUUGCU                                                    |
| miRNA-141                 | UAACACUGUCUGGUAAAGAUGG                                                     |
| Single-base mismatch (SM) | UAGCUUAUCGGACUGAUGUUGA                                                     |
| Double-base mismatch (DM) | UA <u>A</u> CUUAUCGG <u>A</u> CUGAUGUUGA                                   |
| Three-base mismatch (TM)  | U <u>C</u> GCUUAUCGGACUGA <u>U</u> UUGA                                    |

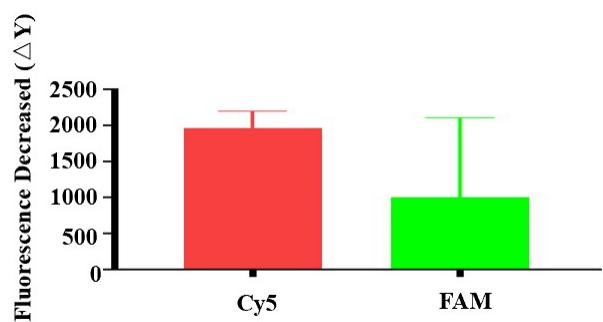

**Fig.S1.** After magnetic beads modified fluorescence, the fluorescence of Cy5 and FAM decreased in the modified solution. The data error bars indicate mean  $\pm$  SD (n=3).

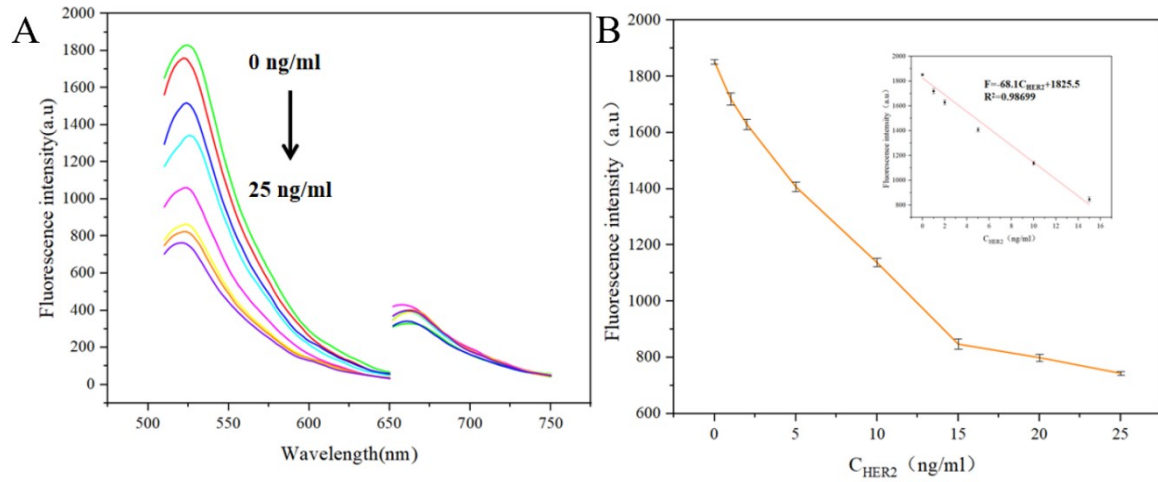

**Fig.S2.** Individual sensitivity detection of HER2 protein. (A) Fluorescence spectra obtained by detecting different concentrations of HER2 protein. (B) Linear relationship between fluorescence intensity and HER2 concentration. The data error bars indicate mean  $\pm$  SD (n=3)

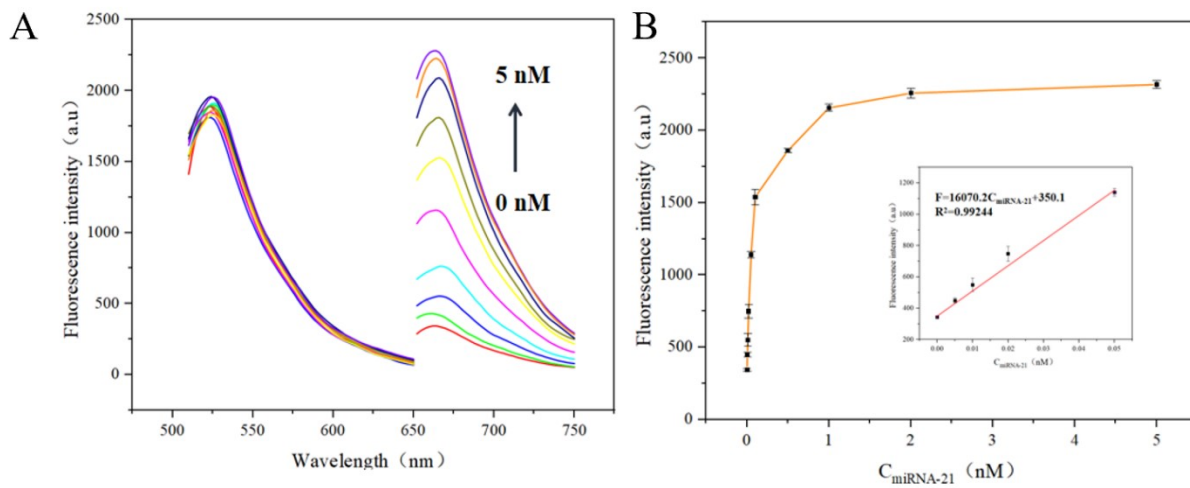

**Fig.S3.** Individual sensitivity detection of miRNA-21. (A) Fluorescence spectra obtained by detecting different concentrations of miRNA-21. (B) Linear relationship between fluorescence intensity and miRNA-21 concentration. The data error bars indicate mean  $\pm$  SD (n=3)

| Sample   | Added    | Determined       | RSD   | Recovery (%) |
|----------|----------|------------------|-------|--------------|
| 1 HER2   | 1 ng/mL  | 1.11±0.07 ng/mL  | 0.063 | 111          |
| miRNA-21 | 1 pM     | 1.03±0.03 pM     | 0.029 | 103          |
| 2 HER2   | 2 ng/mL  | 1.96±0.12 ng/mL  | 0.061 | 98.0         |
| miRNA-21 | 5 pM     | 5.13±0.27 pM     | 0.053 | 102.6        |
| 3 HER2   | 5 ng/mL  | 4.87±0.14 ng/mL  | 0.029 | 97.4         |
| miRNA-21 | 10 pM    | 10.31±0.42 pM    | 0.041 | 103.1        |
| 4 HER2   | 10 ng/mL | 10.54±0.61 ng/mL | 0.058 | 105.4        |
| miRNA-21 | 20 pM    | 19.76±0.31 pM    | 0.016 | 98.8         |

**Table S2.** Recovery of HER2 and miRNA-21 in serum of healthy people with different concentrations.

**CRedit authorship contribution statement**

Miao He, Zhiqiang Hou: Conceptualization, Methodology, Software, Investigation, Validation, Data curation, Writing-original draft. Feifan Yin: Investigation. Wenting Cheng: Validation, Investigation. Zhongyun Wang: Resources, Supervision. Yang Xiang: Conceptualization, Methodology, Review & editing, Supervision, Funding acquisition. All authors have given approval to the final version of the manuscript.
